# Supplementary material for: Improved Cardiovascular Effects of a Novel Pomegranate Byproduct Extract Obtained through Hydrodynamic Cavitation
Source: MDPI journal article supplement (doi:10.3390/nu16040506), 2024-02-10
Supplement: s1 [file s1]

# Improved Cardiovascular Effects of a Novel Pomegranate Byproduct Extract Obtained through Hydrodynamic Cavitation

Giada Benedetti <sup>1</sup>, Lorenzo Flori <sup>1</sup>, Jacopo Spezzini <sup>1</sup>, Vincenzo Miragliotta <sup>2,3,4</sup>, Giulia Lazzarini <sup>2</sup>, Andrea Pirone <sup>2</sup>, Cosimo Meneguzzo <sup>5</sup>, Luca Tagliavento <sup>5</sup>, Alma Martelli <sup>1,3,6</sup>, Michele Antonelli <sup>7</sup>, Davide Donelli <sup>8,9</sup>, Cecilia Faraloni <sup>10</sup>, Vincenzo Calderone <sup>1,3,6</sup>, Francesco Meneguzzo <sup>10,†</sup> and Lara Testai <sup>1,3,4,6,\*</sup>

<sup>1</sup> Department of Pharmacy, University of Pisa, 56126 Pisa, Italy; giada.benedetti@phd.unipi.it (G.B.);

lorenzo.flori@farm.unipi.it (L.F.); jacopo.spezzini@phd.unipi.it (J.S.); alma.martelli@unipi.it (A.M.);  
vincenzo.calderone@unipi.it (V.C.)

<sup>2</sup> Department of Veterinary Sciences, University of Pisa, 56126 Pisa, Italy;  
vincenzo.miragliotta@unipi.it (V.M.); giulia.lazzarini@phd.unipi.it (G.L.); andrea.pirone@unipi.it (A.P.)

<sup>3</sup> Interdepartmental Research Centre of Ageing Biology and Pathology, University of Pisa, 56120 Pisa, Italy

<sup>4</sup> Centro per l'Integrazione della Strumentazione scientifica dell'Università di Pisa (CISUP), Lungarno Pacinotti 43, 56126 Pisa, Italy

<sup>5</sup> HyRes Srl, via Salvator Rosa 18, 82100 Benevento, Italy; cosimo.meneguzzo@hyres.it (C.M.); luca.tagliavento@hyres.it (L.T.)

<sup>6</sup> Interdepartmental Research Center Nutrafood "Nutraceuticals and Food for Health", University of Pisa, 56120 Pisa, Italy

<sup>7</sup> Department of Public Health, AUSL-IRCCS of Reggio Emilia, 42122 Reggio Emilia, Italy; michele.antonelli@ausl.re.it

<sup>8</sup> Department of Medicine and Surgery, University of Parma, 43121 Parma, Italy; davide.donelli@unipr.it

<sup>9</sup> Division of Cardiology, Azienda Ospedaliero-Universitaria di Parma, 43126 Parma, Italy

<sup>10</sup> Institute of Bioeconomy, National Research Council of Italy, Via Madonna del Piano 10, 50019 Florence, Italy; cecilia.faraloni@cnr.it (C.F.); francesco.meneguzzo@cnr.it (F.M.)

\* Correspondence: lara.testai@unipi.it

† These authors contributed equally to this work.

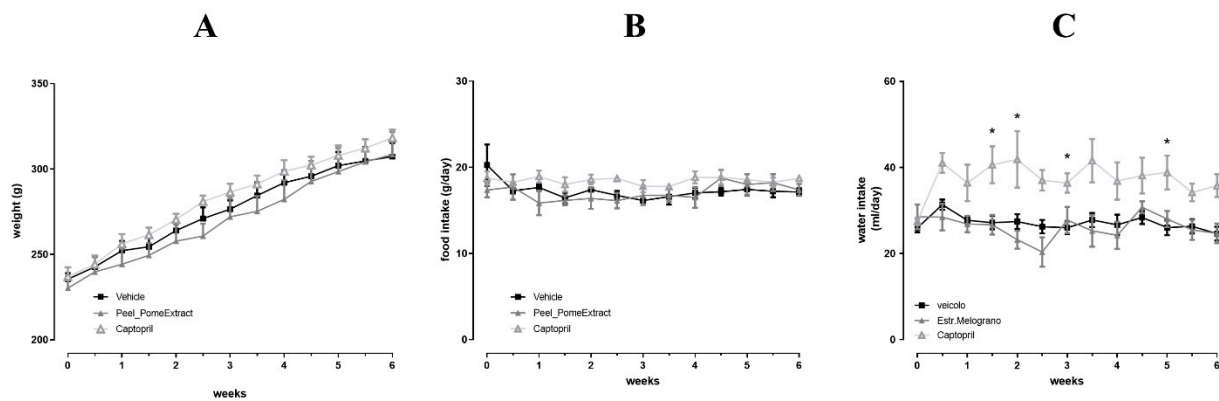

**Figure S1.** In this figure graphics show the trend of ponderal parameters (A), food (B) and water intakes (C)

|                           | Vehicle    | PomeExtract | Captopril  |
|---------------------------|------------|-------------|------------|
| Total Cholesterol (mg/dl) | 58.8 ± 3.2 | 60.0 ± 2.9  | 57.3 ± 2.7 |
| Triglycerides (mg/dl)     | 49.5 ± 2.7 | 51.0 ± 2.5  | 47.5 ± 2.2 |
| Glycemia (mg/dl)          | 63.8 ± 4.5 | 61.3 ± 3.8  | 63.0 ± 4.8 |

**Table S1.** In this table blood parameters of Total Cholesterol, Triglycerides and Glycemia are shown. All values are expressed as mg/dl. No relevant difference is observed in samples of animals from the three different treatments.
